# Supplementary figures and images for: Geographic Distribution and Temporal Trends of HIV-1 Subtypes through Heterosexual Transmission in China: A Systematic Review and Meta-Analysis
Source: MDPI journal article supplement (doi:10.3390/ijerph14070830), 2017-07-24

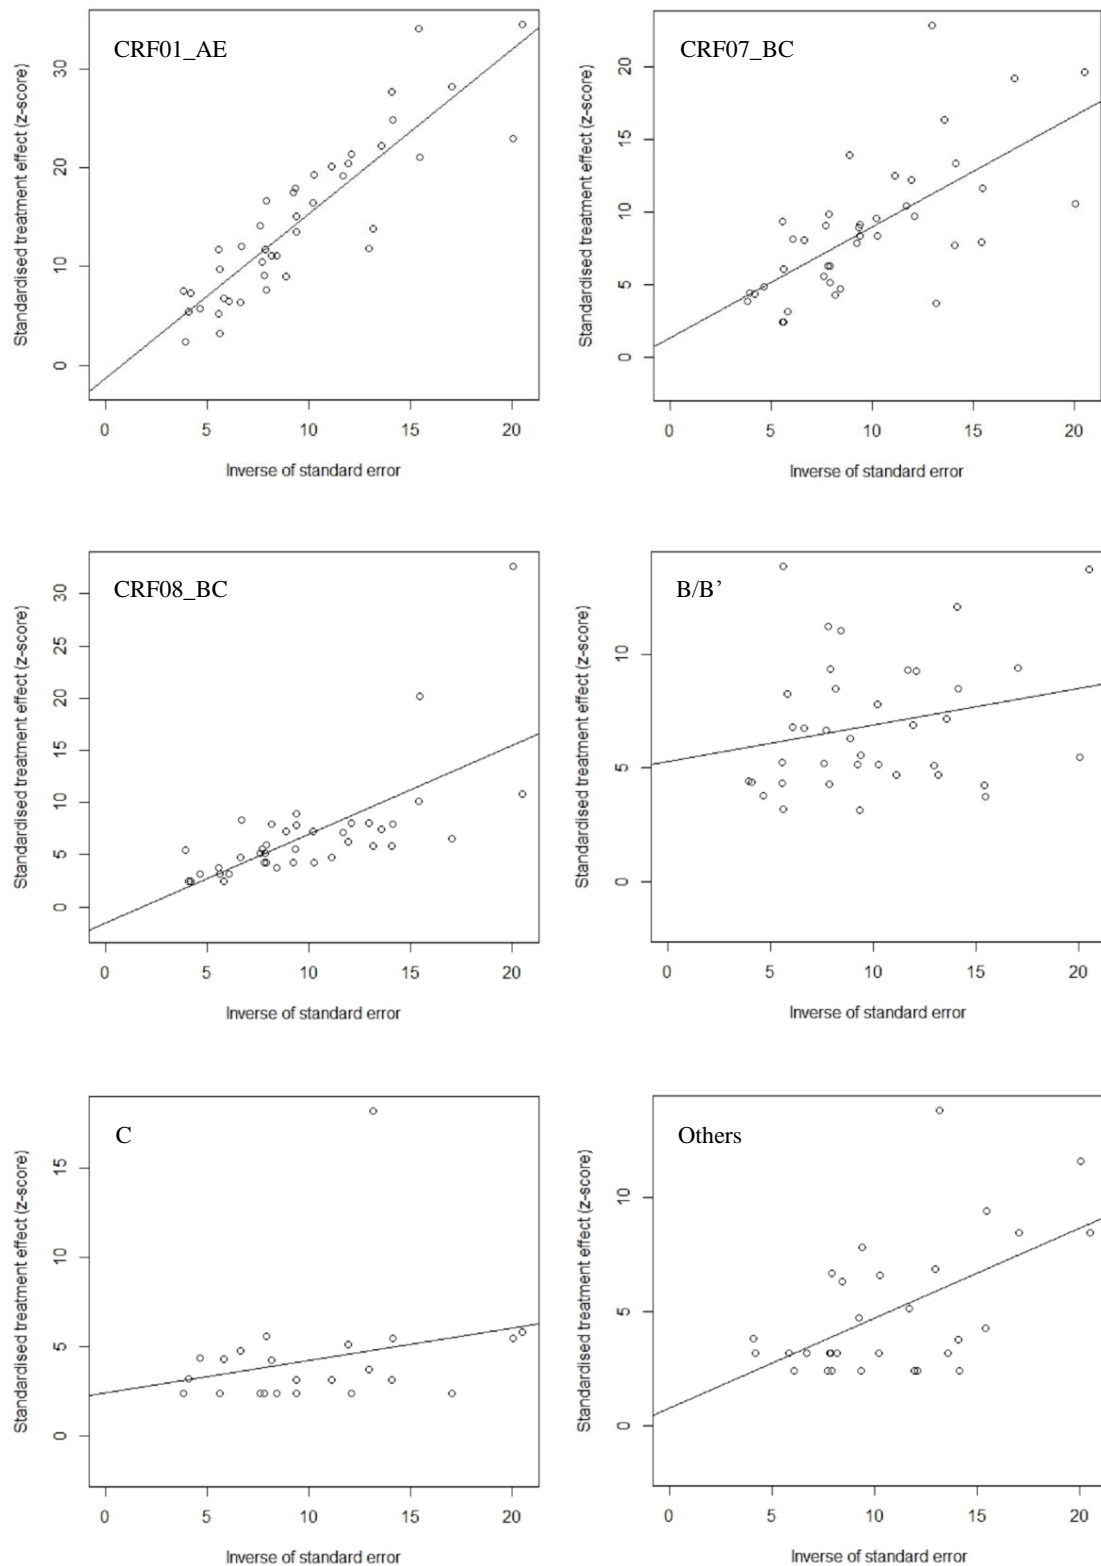

**S2 Fig. Egger's linear regression test of funnel plots asymmetry**

Supplement: s1 [file s1]

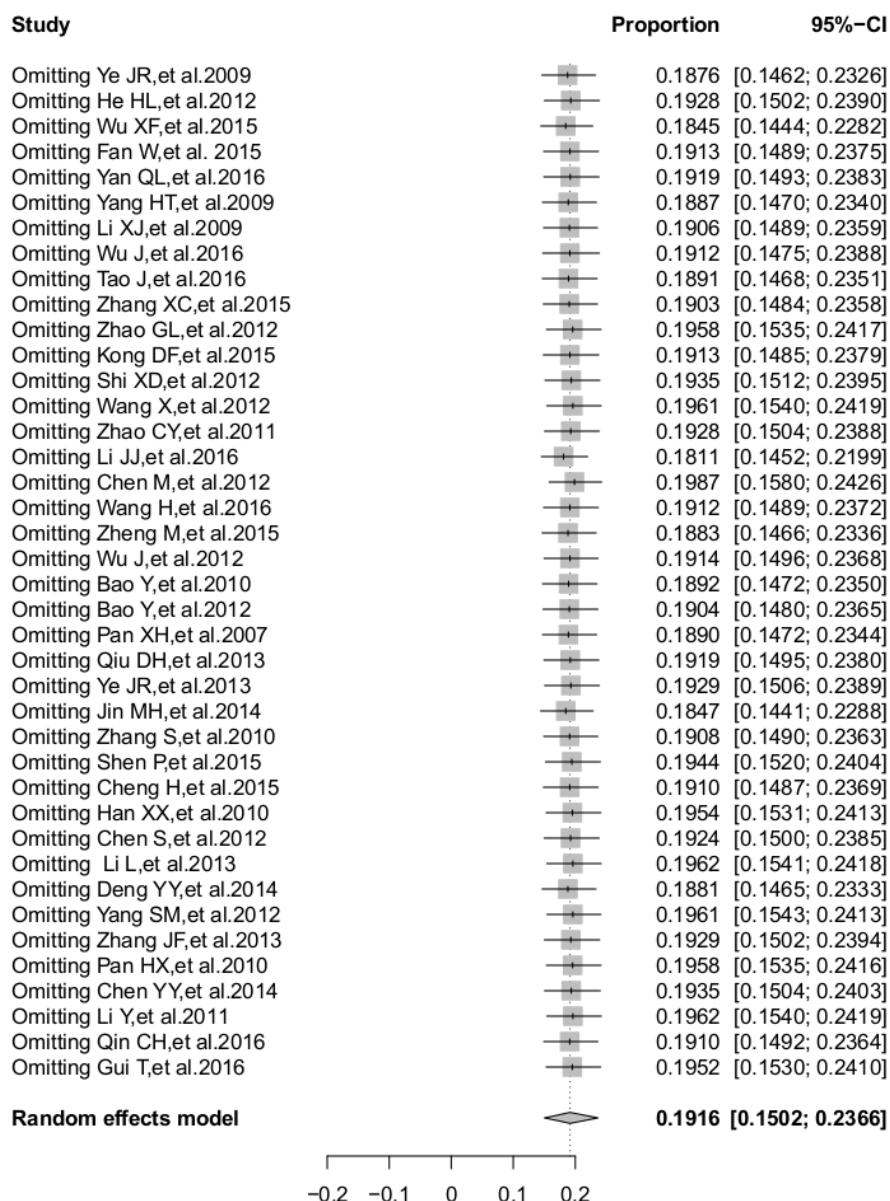

**CRF07\_BC**

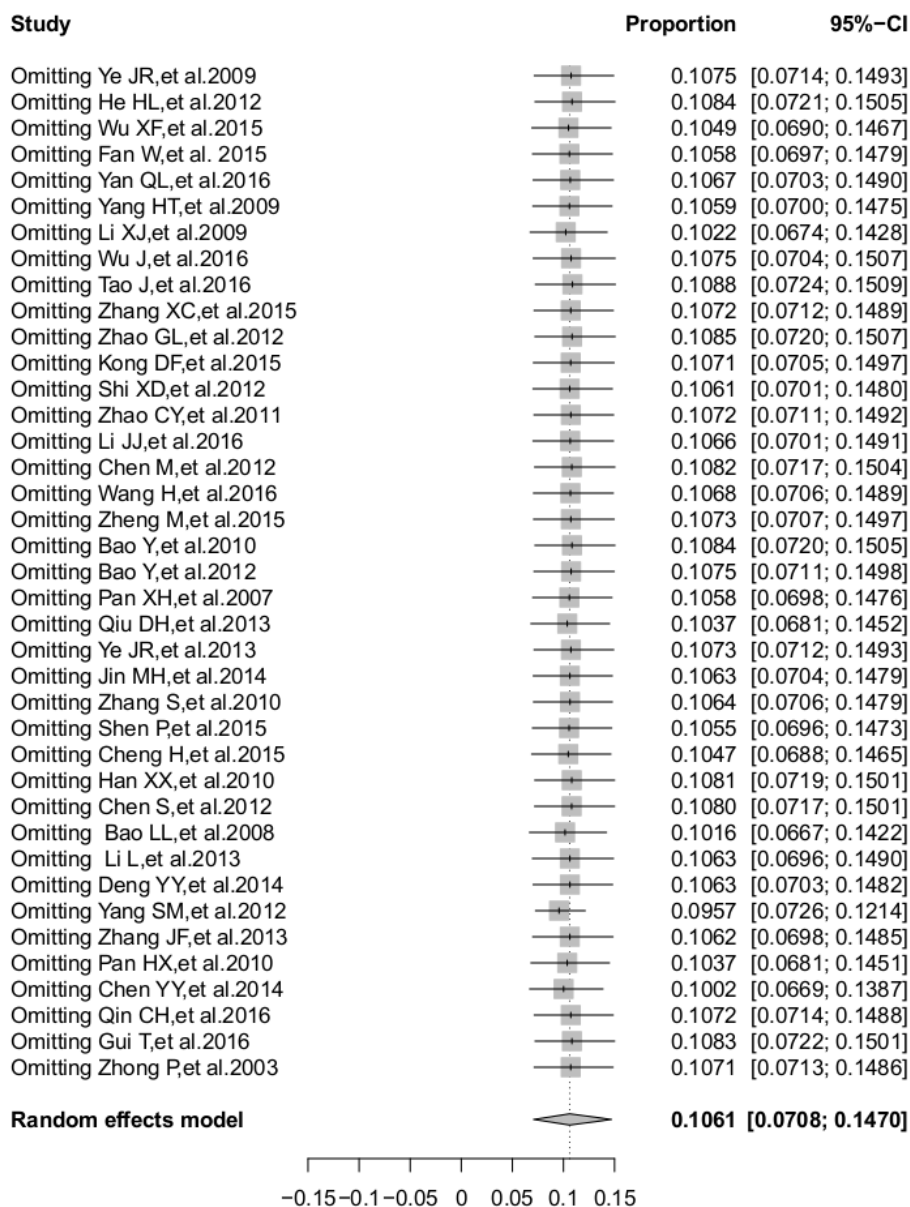

**CRF08\_BC**

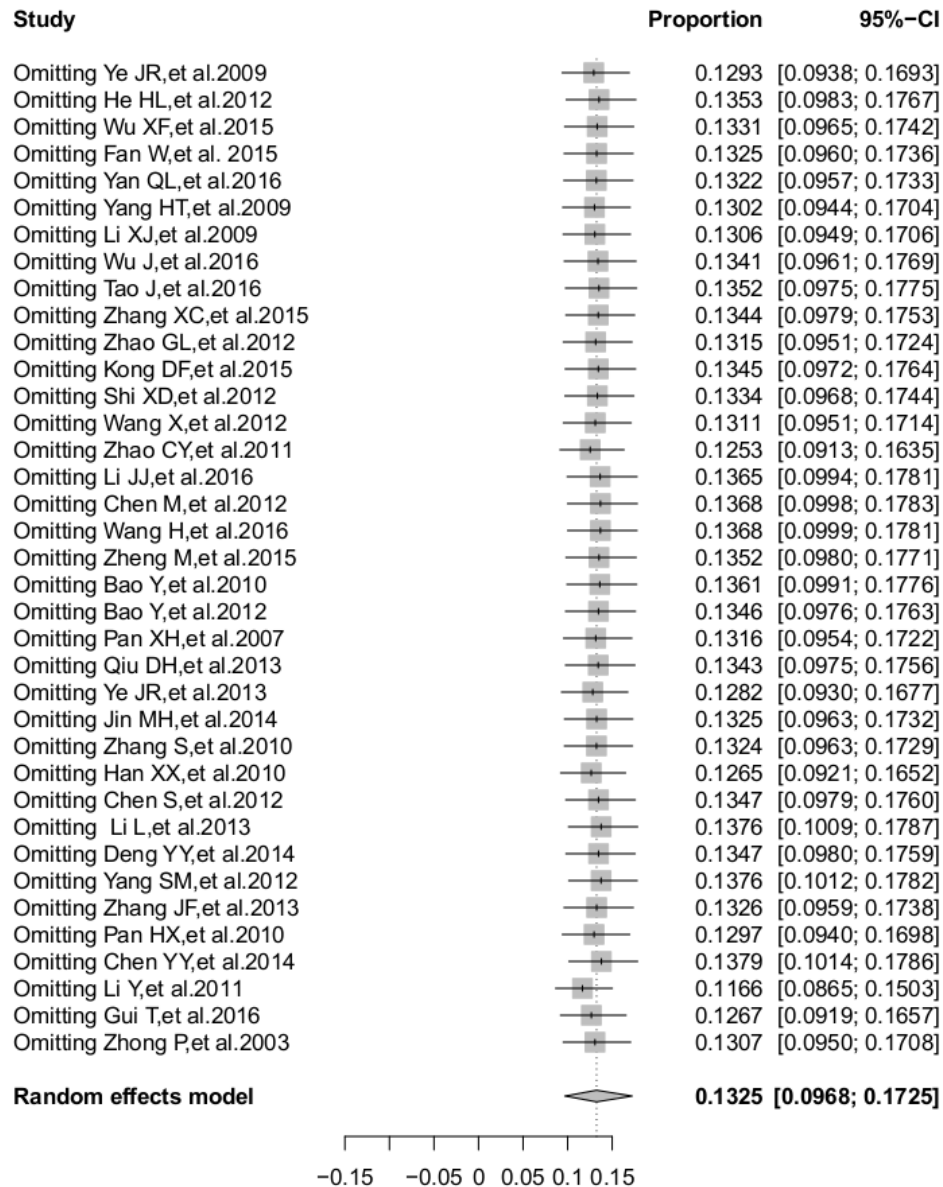

**Subtype B/B'**

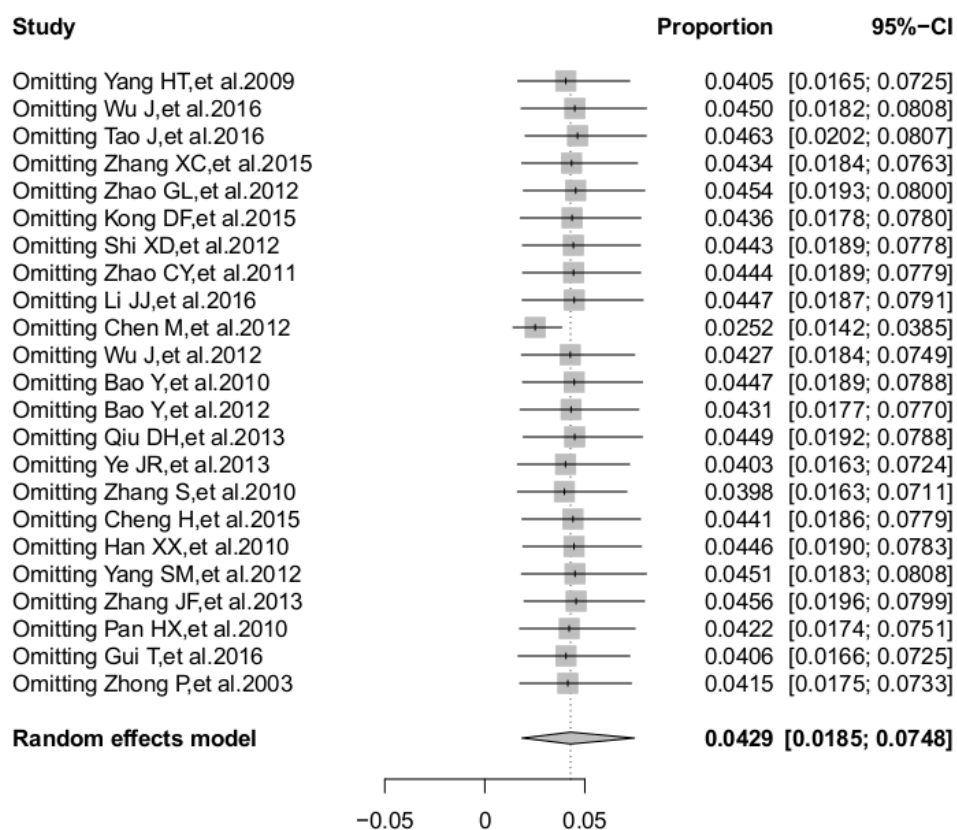

## Subtype C

Supplement: s1 [file s1]
